# Supplementary material
Source: Springer Nature journal article supplement (https://www.springermedizin.de/resource/supplementary/12936_2010_1198_MOESM1_ESM.pdf/9549190)
Supplement: MOESM1 [file 9549190]

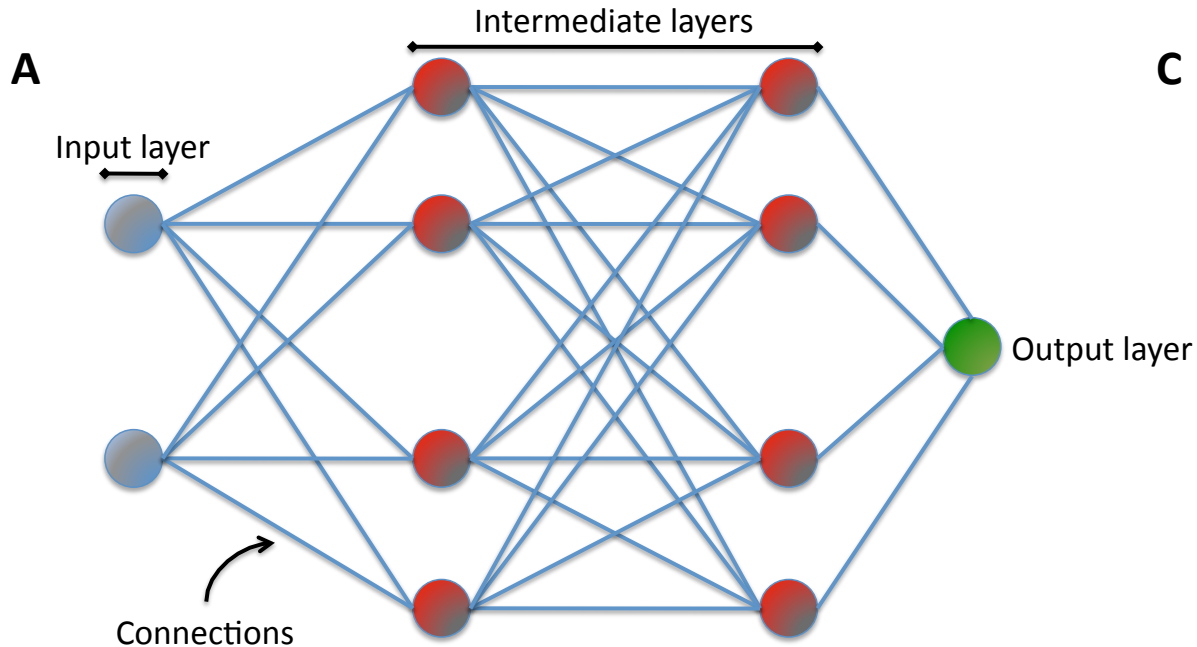

**C**

MaIDANN

Age (y)  Sex  M  F

No. of previous malaria episodes

Months living in endemic area

Plasma IL-10 (pg/mL)  Plasma IFN- $\gamma$  (pg/mL)

Use of bed net  Yes  No

DIAGNOSIS

\*Possibilities: No Malaria OR Asymptomatic Malaria

**B** General design of the Artificial Neural Network used by the MaIDANN software

| Software version                  | Input layer                                                                                  | 02 intermediate layers                                                                | Output layer                                                                    |
|-----------------------------------|----------------------------------------------------------------------------------------------|---------------------------------------------------------------------------------------|---------------------------------------------------------------------------------|
| MaIDANN Epidemiologic             | <p>● Neurons</p> <p><b>31 neurons</b></p> <p>Epidemiological variables*</p>                  | <p>● Neurons</p> <p><b>10 neurons</b></p> <p>Data processing to identify patterns</p> | <p>● Neurons</p> <p><b>01 neuron</b></p> <p>Generation of malaria diagnosis</p> |
| MaIDANN Epidemiologic + cytokines | <p>● Neurons</p> <p><b>07 neurons</b></p> <p>Epidemiological variables + cytokine levels</p> | <p>● Neurons</p> <p><b>10 neurons</b></p> <p>Data processing to identify patterns</p> | <p>● Neurons</p> <p><b>01 neuron</b></p> <p>Generation of malaria diagnosis</p> |
